# Supplementary material for: Quantitative properties and receptor reserve of the IP3 and calcium branch of Gq-coupled receptor signaling
Source: PubMed Central journal article supplement — J Gen Physiol. 2013 May;141(5):521–35. doi: 10.1085/jgp.201210886 (PMC3639578; doi:10.1085/jgp.201210886), 2013-05
Supplement: supp_jgp.201210886_JGP_201210886_sm.pdf [file supp_jgp.201210886_JGP_201210886_sm.pdf]

Dickson et al., <http://www.jgp.org/cgi/content/full/jgp.201210886/DC1>

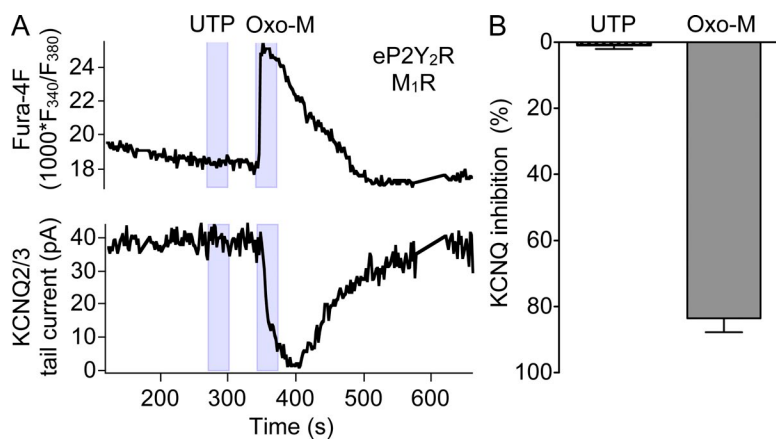

**Figure S1.** In whole-cell recording configuration, UTP does not elicit a calcium rise or inhibit KCNQ2/3 currents. (A) Simultaneous recording of Fura-4F ( $F_{340}/F_{380}$  ratio; top) and KCNQ2/3 tail currents (bottom) in whole-cell configuration with a patch pipette containing Fura-4F salt. Fluorescence at 340 and 380 nm was recorded by photometry. KCNQ2/3 channels were activated by a depolarization to  $-20$  mV for 400 ms and quantified as tail currents 20 ms after repolarization to  $-60$  mV. (B) Summary of KCNQ2/3 inhibition by 100  $\mu$ M UTP ( $n = 22$ ) and 10  $\mu$ M Oxo-M ( $n = 23$ ).

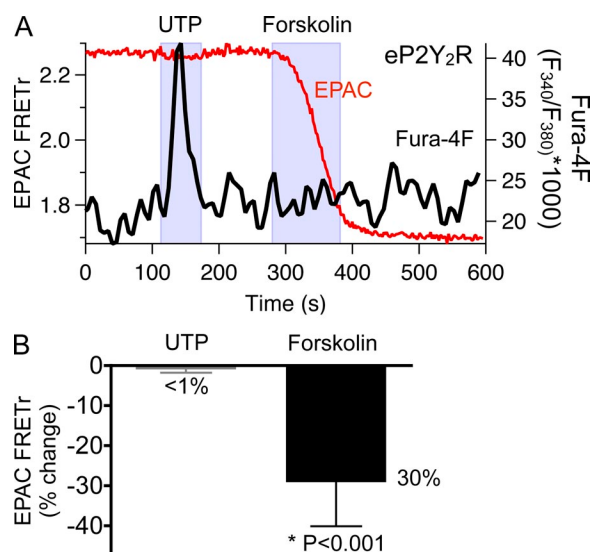

**Figure S2.** Endogenous P2Y receptors elevate calcium but not cAMP. (A) Simultaneous recording of FRET (left axis, red trace) and Fura-4F ratio (right axis, black trace) in a representative cell transfected with the cAMP reporter EPAC1. The application of 100  $\mu$ M UTP leads to a change in Fura-4F ratio, reflecting a calcium rise, but no change in EPAC FRET, thus no detectable change in cAMP. Responsiveness of EPAC to cAMP is confirmed by the FRET decrease in response to 10  $\mu$ M forskolin, an activator of adenylyl cyclase. (B) Summary of FRET changes in  $n = 8$  experiments as in A. Significance was determined by  $t$  test.

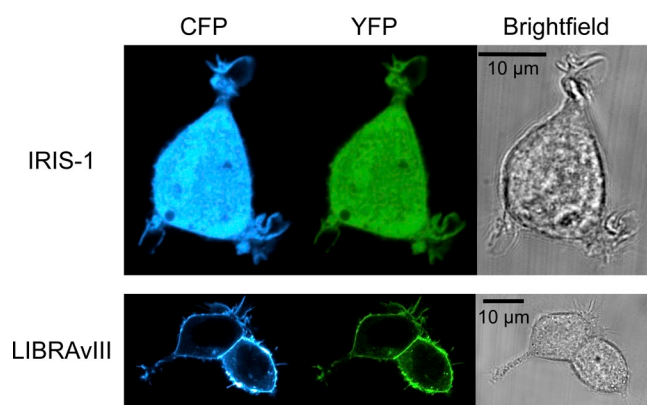

**Figure S3.** Expression patterns of IRIS-1 and LIBRAvIII FRET probes. Confocal images of cells transfected with the indicated plasmids (63× objective; 710 microscope; Carl Zeiss). The 405- and 516-nm laser lines were used for excitation of CFP and YFP. Emission was collected from 460 to 480 nm and from 540 to 580 nm. Note plasma membrane localization of LIBRAvIII and the mostly cytosolic localization of IRIS-1. The brightfield image was collected at the “transmitted” light detector with 480-nm excitation.

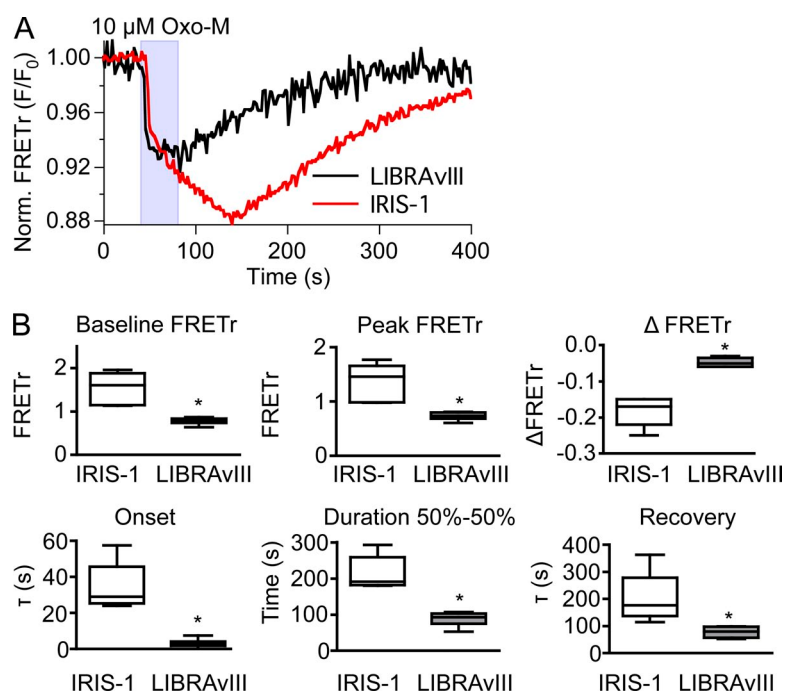

**Figure S4.** Comparison of the IRIS-1 and LIBRAvIII FRET probes for IP<sub>3</sub>. (A) Representative responses of IRIS-1 and LIBRAvIII to 10 µM Oxo-M. (B) Box plots comparing the mean temporal characteristics between IRIS-1 and LIBRAvIII ( $n = 9$  for each probe). Box plot lines represent the mean, quartiles, and range. \*,  $P < 0.05$ .

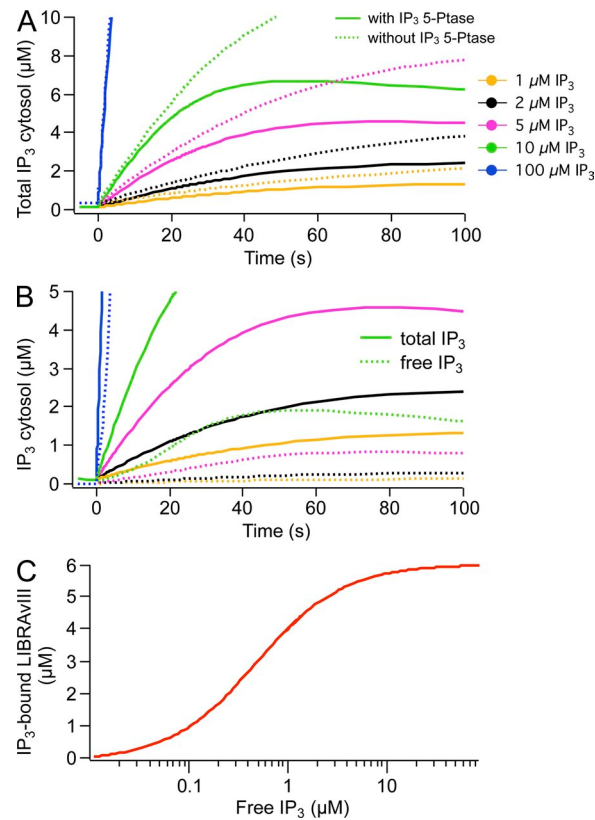

**Figure S5.** Model simulations of dialysis of IP<sub>3</sub> and response of LIBRAvIII. (A) Model outputs of total cellular IP<sub>3</sub> (free plus LIBRAvIII-bound) during dialysis of IP<sub>3</sub> from a simulated patch pipette initially filled with 100, 10, 5, 2, or 1 μM IP<sub>3</sub> with (solid lines) and without (dashed lines) activity of an “endogenous cytosolic IP<sub>3</sub> 5-phosphatase.” The rate of the phosphatase is informed by the recovery time course of the LIBRAvIII response to Oxo-M. Total LIBRAvIII concentration is 6 μM. Note that with 10 μM of initial IP<sub>3</sub> in the pipette, total (free plus bound) cellular IP<sub>3</sub> surpasses 10 μM because of buffering by LIBRAvIII. See our companion paper for details of the model. (B) Model outputs comparing free IP<sub>3</sub> (dashed lines) and total IP<sub>3</sub> (free plus LIBRAvIII-bound, solid lines) during pipette dialysis. In the simulation, “endogenous IP<sub>3</sub> 5-phosphatase” is active. Note that with 10 μM of initial IP<sub>3</sub> in the pipette, cytosolic free IP<sub>3</sub> does not reach 10 μM as some depletion of pipette IP<sub>3</sub> occurs and the 5-phosphatase is active. (C) IP<sub>3</sub>-binding curve of LIBRAvIII extracted from the model. With a  $K_d$  of 0.5 μM, LIBRAvIII approaches saturation above 2 μM of free IP<sub>3</sub>.

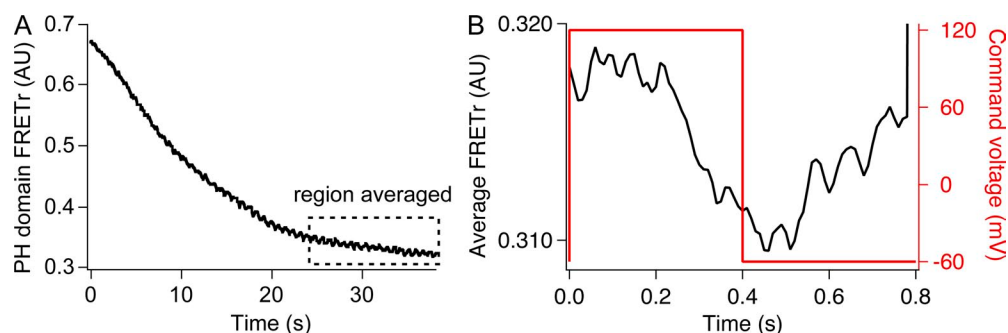

**Figure S6.** Time course of  $\text{PIP}_2$  during repeated VSP activation. Cells were transfected with PH-CFP and PH-YFP (to report  $\text{PIP}_2$  by FRET) and VSP. Cells were voltage clamped in whole-cell configuration. (A) FRET recording in response to a concatenated series of 48 depolarizations to +120 mV for 400 ms alternating with 400 ms at the -60-mV hold-

ing potential. FRET gradually decreases, indicating accumulating dephosphorylation of  $\text{PIP}_2$  by VSP. The time course is actually sawtoothed with each depolarization. (B) FRET time course averaged cyclically for the 18 last cycles of depolarization (boxed area in A) and superimposed with the command voltage time course. The average is mildly filtered (see Materials and methods in the main text).

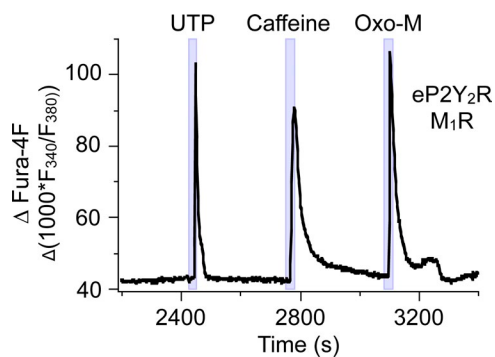

**Figure S7.** Evidence for ryanodine receptors in tsA cells, a calcium rise in response to caffeine. A cell transfected with  $\text{M}_1\text{R}$  loaded with Fura-4F-AM was treated with 100  $\mu\text{M}$  UTP, 25 mM caffeine, and 10  $\mu\text{M}$  Oxo-M during measurements by photometry. High caffeine, an activator of ryanodine receptors, increases calcium in this cell. Similar observations were made in five cells.

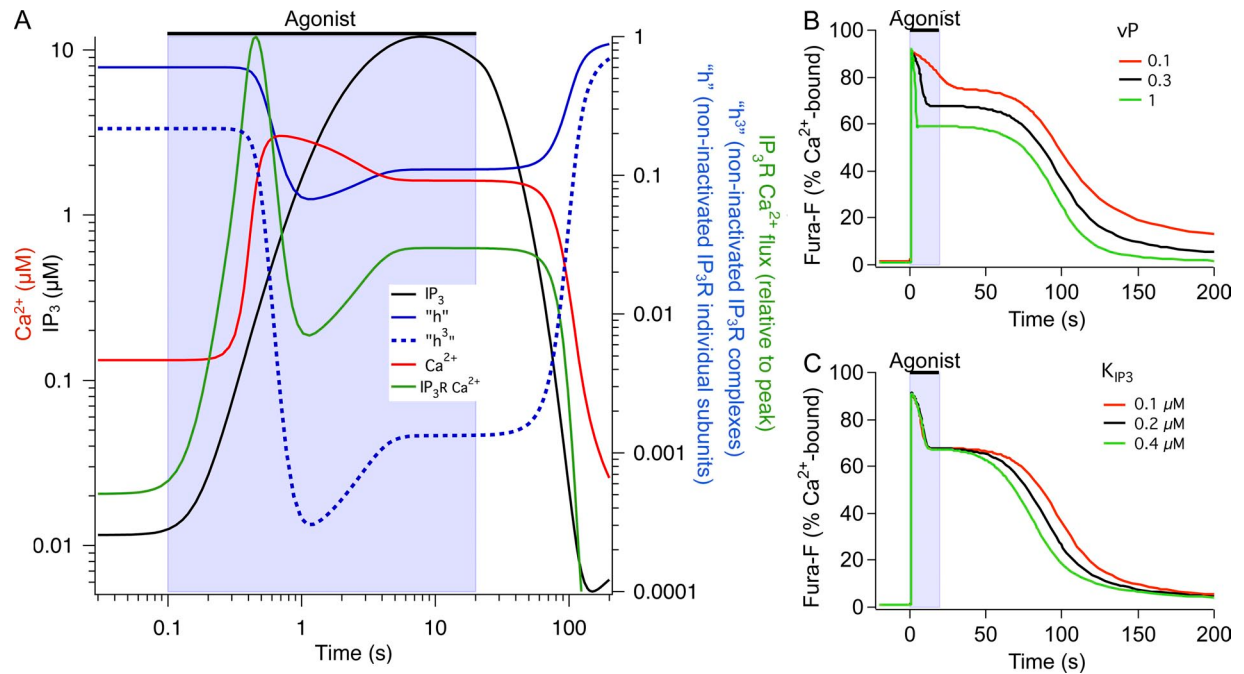

**Figure S8.** Origin of the plateau in the calcium and Fura-4F responses in our model. The details discussed are likely model dependent. (A) Superimposed time courses in the model of IP<sub>3</sub> (black), calcium (red), noninactivated IP<sub>3</sub>R individual subunits ("h," blue solid), noninactivated IP<sub>3</sub>R complexes ("h<sup>3</sup>," blue dashed), and calcium flux through IP<sub>3</sub>Rs (green). IP<sub>3</sub> and calcium are plotted as absolute concentrations on the left axis, and "h," "h<sup>3</sup>," and scaled IP<sub>3</sub>R Ca<sup>2+</sup> flux are plotted on the right axis. Note that all axes are logarithmic, a log-log plot. See main text for description. (B) Fura-4F response in the model to 10 μM Oxo-M for different values of the scaling factor of the SERCA pump (vP) showing an influence on the height of the plateau relative to the peak. This effect occurs because with faster calcium clearance, calcium has dropped more by the time the IP<sub>3</sub>R recovers from inactivation (which is dependent on time and calcium). (C) Fura-4F response in the model to 10 μM Oxo-M for different values of the IP<sub>3</sub> dissociation constant of the IP<sub>3</sub>R (K<sub>IP3</sub>), illustrating that mainly the duration of the response is affected.

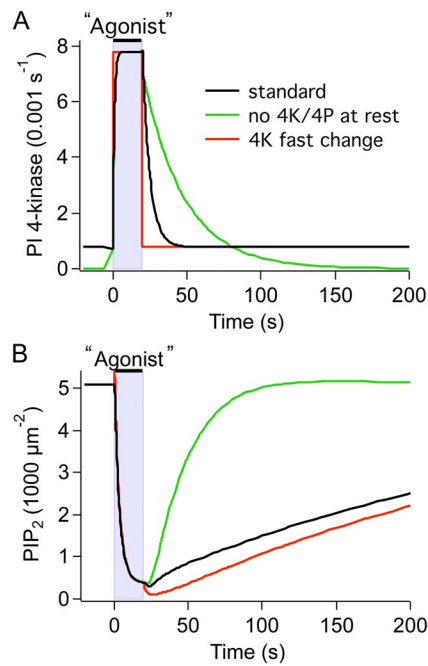

**Figure S9.** Establishing the time course of acceleration of PIP<sub>2</sub> synthesis. Computational study of the effect of the time course of the rate constant of the PI 4-kinase,  $k_{4k}$ , during 10  $\mu$ M Oxo-M (A) on the time course of PIP<sub>2</sub> depletion (B). Almost instantaneous change of PI 4-kinase (red trace) produces a positive PIP<sub>2</sub> transient at Oxo-M onset and a negative PIP<sub>2</sub> transient at washout. Increase of  $k_{4k}$  with a time constant of 1 s or more removes the transient at onset; decrease of  $k_{4k}$  with a time constant of 10 s or more removes the transient at washout (black trace). An exponential decay of  $k_{4k}$  to zero after washout of Oxo-M with a time constant of 27.5 s produces faster PIP<sub>2</sub> recovery than that observed experimentally (green trace). Decay of  $k_{4k}$  with a shorter time constant produces insufficient recovery; decay of  $k_{4k}$  with a longer time constant produces overshooting recovery (both not depicted).
